# Supplementary material for: IL-1R8 Downregulation and Concomitant TLR7 and TLR9 Upregulation Are Related to the Pathogenesis of Canine Diffuse Large B-Cell Lymphoma
Source: MDPI journal article supplement (doi:10.3390/vetsci9050209), 2022-04-25
Supplement: s1 [file s1]

**Table S4. *IL-1R8*, *p52*, *TLR7*, *TLR9* and *MYC* expression in cDLBCLs and control lymph nodes. Data are expressed as relative quantification values (arbitrary units, mean  $\pm$  SD).**

|                      | Mean $\pm$ SD    |                 | Fold change | p-value     |
|----------------------|------------------|-----------------|-------------|-------------|
|                      | DLBCLs           | Control LNs     |             |             |
| <b><i>IL-1R8</i></b> | 0.06 $\pm$ 0.07  | 0.48 $\pm$ 0.68 | -7.47       | p=1.123E-05 |
| <b><i>p52</i></b>    | 1.00 $\pm$ 0.68  | 2.70 $\pm$ 0.83 | -2.69       | p=7.638E-07 |
| <b><i>TLR7</i></b>   | 1.78 $\pm$ 1.09  | 0.93 $\pm$ 0.47 | 1.92        | p=0.004485  |
| <b><i>MYC</i></b>    | 11.61 $\pm$ 4.62 | 5.15 $\pm$ 1.13 | 2.26        | p=5.772E-06 |
| <b><i>TLR9</i></b>   | 0.32 $\pm$ 0.17  | 0.15 $\pm$ 0.07 | 2.16        | p=0.0002687 |
