# Supplementary material for: IL-1R8 Downregulation and Concomitant TLR7 and TLR9 Upregulation Are Related to the Pathogenesis of Canine Diffuse Large B-Cell Lymphoma
Source: MDPI journal article supplement (doi:10.3390/vetsci9050209), 2022-04-25
Supplement: s1 [file s1]

**Table S1. Primer pair list.**

| <b>Gene</b>          | <b>Protein</b>                                                       | <b>Sequence (5' → 3')</b>                              | <b>Gene ID</b> | <b>Amplicon</b> |
|----------------------|----------------------------------------------------------------------|--------------------------------------------------------|----------------|-----------------|
| <b><i>TLR7</i></b>   | Toll-like receptor 7                                                 | F:TGGAAATTGCCCTCGTT<br>R:GTCAATGCATCGAAAGCTGA          | 491743         | 99 bp           |
| <b><i>TLR9</i></b>   | Toll-like receptor 9 protein                                         | F:GCAATACCCCGAGCCTGATG<br>R:TATGCAGGCGATTCTGGGAC       | 403502         | 105 bp          |
| <b><i>C-MYC</i></b>  | myc proto-oncogene protein                                           | F:GCGACTCGGAGGAAGAACAA<br>R:GACCCCGATTCTGGACCTTTT      | 403924         | 94 bp           |
| <b><i>NFKB2</i></b>  | nuclear factor NF-kappa-B p100 subunit                               | F:GCCCCTGAAGCCAGTTATTTTC<br>R:CCAGGAGACTTGCTGTCATGG    | 486858         | 51 bp           |
| <b><i>IL-1R8</i></b> | Interleukine-1 receptor 8                                            | F:GATGACAAGGACCCCATGCT<br>R:TTGCATGCGGTGGAGCTAAT       | 100686933      | 142 bp          |
| <b><i>CCZ1</i></b>   | CCZ1 Homolog, Vacuolar Protein Trafficking And Biogenesis Associated | F:TGAAGGCACTGCATTTAATTGTTTAT<br>R:CTTCGGCAAAAATCCAATGT | 479750         | 76 bp           |
