# Supplementary material for: IL-1R8 Downregulation and Concomitant TLR7 and TLR9 Upregulation Are Related to the Pathogenesis of Canine Diffuse Large B-Cell Lymphoma
Source: MDPI journal article supplement (doi:10.3390/vetsci9050209), 2022-04-25
Supplement: s1 [file s1]

Table S5. Spearman correlation results of *IL-1R8*, *p52*, *TLR7*, *TLR9* and *MYC* expression in cDLBCLs. Significant correlations after Benjamini-Hochberg correction are highlighted in bold.

|              |              | rho    | p-value        |
|--------------|--------------|--------|----------------|
| <i>TLR7</i>  | <i>MYC</i>   | 0.329  | 0.02           |
| <i>TLR7</i>  | <i>TLR9</i>  | 0.32   | 0.023          |
| <i>TLR7</i>  | <i>IL1R8</i> | -0.019 | 0.89           |
| <i>TLR7</i>  | <i>p52</i>   | 0.088  | 0.54           |
| <i>MYC</i>   | <i>TLR9</i>  | 0.325  | 0.021          |
| <i>MYC</i>   | <i>IL1R8</i> | -0.041 | 0.78           |
| <i>MYC</i>   | <i>p52</i>   | 0.002  | 0.99           |
| <i>TLR9</i>  | <i>IL1R8</i> | 0.106  | 0.46           |
| <i>TLR9</i>  | <i>p52</i>   | 0.495  | <b>0.00026</b> |
| <i>IL1R8</i> | <i>p52</i>   | 0.222  | 0.12           |
